# Supplementary material
Source: publisher figshare collection journal article supplement (https://acs.figshare.com/ndownloader/files/3591462)
Supplement: Supplementary file 1 [file 3591462]

# Supporting Information

## Kinetic Monte Carlo Study of Ambipolar Lithium-Ion and Electron Polaron Diffusion into Nanostructured TiO<sub>2</sub>

*Jianguo Yu, Maria L. Sushko\*, Sebastien Kerisit, Kevin M. Rosso\*, and Jun Liu*

Pacific Northwest National Laboratory, Richland, WA 99352 USA

### 1. Discussion of the limitations of the KMC model

Computational efficiency is an important factor for the applicability of the scale bridging models, such as KMC, to the simulation of complex systems. To estimate the dependence of the computational cost of our KMC model on the particle size we considered the charging process. The time required for a nanoparticle to reach a fully charged state is proportional to the cube of the diffusion coefficient for Li ions. Therefore, the time evolution for the large grains is slower than that of the small grains ( $\propto D_{small}^3 / D_{big}^3$ ), which requires more KMC steps ( $\propto D_{big}^3 / D_{small}^3$ ) during the simulation. Moreover, the computational time for the same charging rate to evaluate each KMC step is also proportional to  $D_{big}^3 / D_{small}^3$ . Therefore, the increase in the computational cost for larger grains scales as  $\propto D_{big}^6 / D_{small}^6$ . This limits the capability of the present method to explore transport properties to grain sizes smaller than 100 nm.

## 2. Size effect

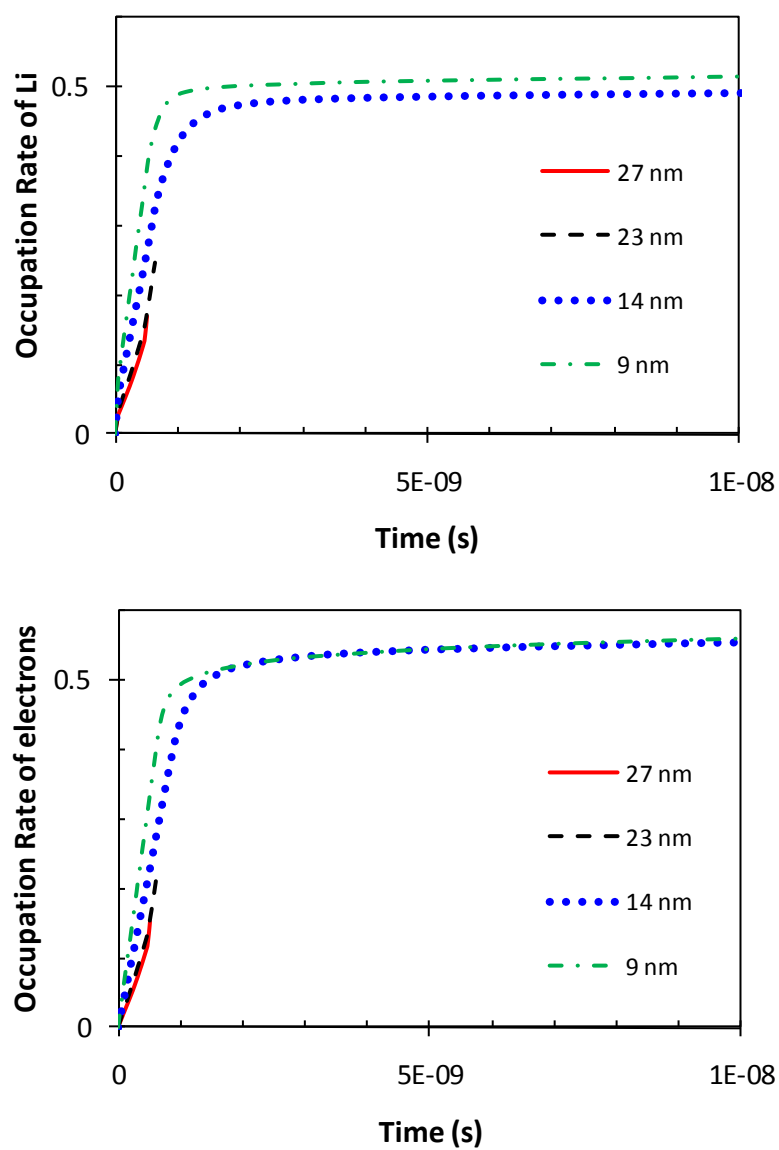

**Figure S1.** Grain size effect for  $\text{Li}^+$  and electron polaron transport in  $\text{TiO}_2$  grains with localized carbon coating and sizes 9, 14, 23 and 27 nm. The charge injection rate is  $2 \times 10^{10}$  per site per second.
